# Supplementary material for: Presumptive First Record of Myotis aurascens (Chiroptera, Vespertilionidae) from China with a Phylogenetic Analysis
Source: MDPI journal article supplement (doi:10.3390/ani13101629), 2023-05-12
Supplement: s1 [file s1]

Table S4 *COI*, *NDI* and *Cytb* sequence used in molecular phylogenetic analyses in this study

| <i>COI</i>       |                                    | <i>NDI</i>       |                             | <i>Cytb</i>      |                             |
|------------------|------------------------------------|------------------|-----------------------------|------------------|-----------------------------|
| Accession Number | Scientific Name                    | Accession Number | Scientific Name             | Accession Number | Scientific Name             |
| HQ580336.1       | <i>Myotis bombinus</i>             | KT777799.1       | <i>Myotis aurascens</i>     | AB106603.1       | <i>Myotis ikonnikovi</i>    |
| JF443018.1       | <i>Myotis nattereri</i>            | AB106581.1       | <i>Myotis ikonnikovi</i>    | MF630871.1       | <i>Myotis altarium</i>      |
| HM541078.1       | <i>Myotis chinensis</i>            | MT628544.1*      | <i>Myotis mystacinus</i>    | MT628544.1*      | <i>Myotis mystacinus</i>    |
| MT407289.1       | <i>Myotis blythii</i>              | AY699871.1       | <i>Myotis muricola</i>      | KT777800.1       | <i>Myotis aurascens</i>     |
| HM541011.1       | <i>Myotis annectans</i>            | AY033972.1       | <i>Myotis montivagus</i>    | AY665144.1       | <i>Myotis muricola</i>      |
| HM541125.1       | <i>Myotis montivagus</i>           | AB106582.1       | <i>Myotis macrodactylus</i> | AF376846.1       | <i>Myotis dasycneme</i>     |
| HQ580338.1       | <i>Myotis macrodactylus</i>        | KT199099.1       | <i>Myotis petax</i>         | AF376858.1       | <i>Myotis montivagus</i>    |
| HQ580195.1       | <i>Myotis petax</i>                | GU372853.1       | <i>Myotis pilosus</i>       | AF376850.1       | <i>Myotis hasseltii</i>     |
| HM541134.1       | <i>Myotis pilosus</i>              | GU372854.1       | <i>Myotis adversus</i>      | KP187907.1       | <i>Myotis horsfieldii</i>   |
| MN339186.1       | <i>Myotis longipes</i>             | AB106571.1       | <i>Myotis frater</i>        | FJ215679.1       | <i>Myotis siligorensis</i>  |
| JF443978.1       | <i>Myotis siligorensis</i>         | AF401457.1       | <i>Myotis blythii</i>       | MF630874.1       | <i>Myotis laniger</i>       |
| JN312059.1       | <i>Myotis laniger</i>              | AB106567.1       | <i>Myotis chinensis</i>     | MH183152.1       | <i>Myotis longipes</i>      |
| HM541172.1       | <i>Myotis adversus taiwanensis</i> | NC_029342.1      | <i>Myotis bombinus</i>      | KX467612.1       | <i>Myotis frater</i>        |
| GU684805.1       | <i>Myotis muricola</i>             | AB106584.1       | <i>Myotis nattereri</i>     | AB085736.1       | <i>Myotis macrodactylus</i> |

---

|             |                             |            |                             |            |                                    |
|-------------|-----------------------------|------------|-----------------------------|------------|------------------------------------|
| HM541097.1  | <i>Myotis hasseltii</i>     | AY033973.1 | <i>Myotis hasseltii</i>     | EF555237.1 | <i>Myotis petax</i>                |
| JF443984.1  | <i>Myotis horsfieldii</i>   | AY033970.1 | <i>Myotis horsfieldii</i>   | KF312497.1 | <i>Myotis adversus taiwanensis</i> |
| JF442928.1  | <i>Myotis brandtii</i>      | HQ529624.1 | <i>Myotis brandtii</i>      | MG570071.1 | <i>Myotis ricketti</i>             |
| JF443976.1  | <i>Myotis altarium</i>      | AB079821.1 | <i>Pipistrellus abramus</i> | KX467606.1 | <i>Myotis blythii</i>              |
| HQ974652.1  | <i>Myotis ikonnikovi</i>    |            |                             | MT992630.1 | <i>Myotis nattereri</i>            |
| MT628544.1* | <i>Myotis mystacinus</i>    |            |                             | AB106588.1 | <i>Myotis chinensis</i>            |
| JX008074.1  | <i>Myotis nipalensis</i>    |            |                             | KX467609.1 | <i>Myotis bombinus</i>             |
| JF442863.1  | <i>Myotis aurascens</i>     |            |                             | AY665168.1 | <i>Myotis brandtii</i>             |
| JF442936.1  | <i>Myotis dasycneme</i>     |            |                             | AB085739.2 | <i>Pipistrellus abramus</i>        |
| JF444018.1  | <i>Pipistrellus abramus</i> |            |                             |            |                                    |

---
