# Supplementary material for: Presumptive First Record of Myotis aurascens (Chiroptera, Vespertilionidae) from China with a Phylogenetic Analysis
Source: MDPI journal article supplement (doi:10.3390/ani13101629), 2023-05-12
Supplement: s1 [file s1]

Table S1 Base composition of the mitogenomes of *M. aurasceus*

| Gene            | A+T (%) | AT skew | GC skew |
|-----------------|---------|---------|---------|
| <i>12S rRNA</i> | 61.29   | 0.206   | -0.096  |
| <i>16S rRNA</i> | 64.86   | 0.200   | -0.084  |
| <i>ND1</i>      | 65.06   | 0.006   | -0.365  |
| <i>ND2</i>      | 67.18   | 0.169   | -0.538  |
| <i>COX1</i>     | 62.46   | -0.134  | -0.100  |
| <i>COX2</i>     | 65.5    | 0.036   | -0.271  |
| <i>ATP8</i>     | 70.61   | 0.139   | -0.533  |
| <i>ATP6</i>     | 65.35   | -0.002  | -0.330  |
| <i>COX3</i>     | 63.14   | -0.095  | -0.232  |
| <i>ND3</i>      | 68.59   | -0.101  | -0.284  |
| <i>ND4L</i>     | 65.32   | -0.134  | -0.301  |
| <i>ND4</i>      | 66.06   | 0.003   | -0.380  |
| <i>ND5</i>      | 67.1    | -0.003  | -0.382  |
| <i>ND6</i>      | 67.62   | -0.285  | 0.588   |
| <i>Cytb</i>     | 62.98   | -0.053  | -0.294  |
| D-loop          | 62.15   | 0.125   | -0.255  |
| Total           | 64.87   | 0.046   | -0.262  |
