# Supplementary material for: Presumptive First Record of Myotis aurascens (Chiroptera, Vespertilionidae) from China with a Phylogenetic Analysis
Source: MDPI journal article supplement (doi:10.3390/ani13101629), 2023-05-12
Supplement: s1 [file s1]

Table S2 Frequency and RSCU values of codon in PCGs in the mitogenome of *M. auraszens*.

| AA  | Codon | Count | RSCU | AA  | Codon | Count | RSCU |
|-----|-------|-------|------|-----|-------|-------|------|
| Ala | GCU   | 85    | 1.43 | Leu | UUA   | 190   | 1.88 |
|     | GCC   | 50    | 0.84 |     | UUG   | 16    | 0.16 |
|     | GCA   | 101   | 1.7  |     | CUU   | 89    | 0.88 |
|     | GCG   | 2     | 0.03 |     | CUC   | 41    | 0.4  |
| Arg | CGU   | 11    | 1.02 | Phe | CUA   | 236   | 2.33 |
|     | CGC   | 11    | 1.02 |     | CUG   | 36    | 0.36 |
|     | CGA   | 42    | 3.88 |     | UUU   | 159   | 1.36 |
|     | CGG   | 1     | 0.09 |     | UUC   | 74    | 0.64 |
| Asn | AAU   | 99    | 1.3  | Pro | CCU   | 64    | 1.31 |
|     | AAC   | 53    | 0.7  |     | CCC   | 52    | 1.07 |
| Asp | GAU   | 41    | 1.22 |     | CCA   | 78    | 1.6  |
|     | GAC   | 26    | 0.78 | Ser | CCG   | 1     | 0.02 |
| Cys | UGU   | 10    | 0.91 |     | UCU   | 85    | 1.83 |
|     | UGC   | 12    | 1.09 |     | UCC   | 37    | 0.8  |
| Gln | CAA   | 81    | 1.82 |     | UCA   | 95    | 2.04 |
|     | CAG   | 8     | 0.18 |     | UCG   | 5     | 0.11 |
|     | GAA   | 76    | 1.57 |     | AGU   | 25    | 0.54 |
|     | GAG   | 21    | 0.43 |     | AGC   | 32    | 0.69 |
| Gly | GGU   | 48    | 0.89 | Ter | UGA   | 97    | 3    |
|     | GGC   | 41    | 0.76 | Thr | ACU   | 120   | 1.5  |
|     | GGA   | 103   | 1.92 |     | ACC   | 56    | 0.7  |
|     | GGG   | 23    | 0.43 |     | ACA   | 135   | 1.69 |
| His | CAU   | 50    | 1.05 |     | ACG   | 9     | 0.11 |
|     | CAC   | 45    | 0.95 | Trp | UGG   | 7     | 1    |
| Ile | AUU   | 249   | 1.3  | Tyr | UAU   | 88    | 1.25 |
|     | AUC   | 94    | 0.49 |     | UAC   | 53    | 0.75 |
|     | AUA   | 231   | 1.21 | Val | GUU   | 53    | 1.23 |
| Lys | AAA   | 89    | 1.87 |     | GUC   | 25    | 0.58 |
|     | AAG   | 6     | 0.13 |     | GUA   | 87    | 2.02 |
| Met | AUG   | 30    | 1    |     | GUG   | 7     | 0.16 |
