# Supplementary material for: Presumptive First Record of Myotis aurascens (Chiroptera, Vespertilionidae) from China with a Phylogenetic Analysis
Source: MDPI journal article supplement (doi:10.3390/ani13101629), 2023-05-12
Supplement: s1 [file s1]

Table S3 Complete mitochondrial sequence used in molecular phylogenetic analyses in this study

| Accession Number | Scientific Name              | Accession Number | Scientific Name                |
|------------------|------------------------------|------------------|--------------------------------|
| NC_036312.1      | <i>Myotis dominicensis</i>   | KU521385.1       | <i>Murina huttoni</i>          |
| NC_036328.1      | <i>Myotis martiniquensis</i> | NC_021119.1      | <i>Murina ussuriensis</i>      |
| NC_036319.1      | <i>Myotis yumanensis</i>     | MK747248.1       | <i>Murina cyclotis</i>         |
| NC_036327.1      | <i>Myotis albescens</i>      | NC_025949.1      | <i>Murina leucogaster</i>      |
| NC_036314.1      | <i>Myotis keaysi</i>         | MK747249.1       | <i>Murina shuipuenensis</i>    |
| NC_036316.1      | <i>Myotis oxyotus</i>        | HM164052.1       | <i>Plecotus auritu</i>         |
| NC_036318.1      | <i>Myotis nigricans</i>      | NC_027977.1      | <i>Plecotus macrobullaris</i>  |
| NC_036317.1      | <i>Myotis riparius</i>       | NC_016872.1      | <i>Plecotus rafinesquii</i>    |
| NC_025308.1      | <i>Myotis brandtii</i>       | NC_033347.1      | <i>Vespertilio murinus</i>     |
| NC_036321.1      | <i>Myotis leibii</i>         | KM092493.1       | <i>Vespertilio sinensis</i>    |
| NC_036320.1      | <i>Myotis auriculus</i>      | MK135784.1       | <i>Hypsugo alaschanicus</i>    |
| NC_036326.1      | <i>Myotis volans</i>         | KX355640.1       | <i>Pipistrellus abramus</i>    |
| MF143491.1       | <i>Myotis lucifugus</i>      | NC_029191.1      | <i>Pipistrellus coromandra</i> |
| NC_036313.1      | <i>Myotis evotis</i>         | KU058655.1       | <i>Pipistrellus kuhlii</i>     |
| NC_036323.1      | <i>Myotis thysanodes</i>     | MK167360.1       | <i>Nyctalus aviator</i>        |

---

|             |                           |             |                                |
|-------------|---------------------------|-------------|--------------------------------|
| NC_036324.1 | <i>Myotis atacamensis</i> | NC_027237.1 | <i>Nyctalus noctula</i>        |
| NC_029422.1 | <i>Myotis muricola</i>    | NC_041160.1 | <i>Nyctalus plancyi</i>        |
| NC_025568.1 | <i>Myotis davidii</i>     | NC_044489.1 | <i>Miniopterus fuliginosus</i> |
| NC_036325.1 | <i>Myotis horsfieldii</i> | MK177282.1  | <i>Tadarida latouchei</i>      |
| NC_034227.1 | <i>Myotis bechsteinii</i> |             |                                |
| NC_041638.1 | <i>Myotis frater</i>      |             |                                |
| NC_056111.1 | <i>Myotis ricketti</i>    |             |                                |
| NC_029342.1 | <i>Myotis bombinus</i>    |             |                                |
| MT588108.1  | <i>Myotis blythii</i>     |             |                                |
| KT901455.1  | <i>Myotis myotis</i>      |             |                                |

---
